# Supplementary material for: Proteomics Mapping of Cord Blood Identifies Haptoglobin “Switch-On” Pattern as Biomarker of Early-Onset Neonatal Sepsis in Preterm Newborns
Source: PubMed Central journal article supplement (PMC3189953; doi:10.1371/journal.pone.0026111), 2011-10-10
Supplement: pone.0026111.s001.pdf [file pone.0026111.s001.pdf]

**Table S1. 2D-DIGE and PANTHER results with convergence of unambiguous differentially expressed identities into proteomics targets**

| IPI ID                           | Spot MW (kDa) | Avg Spot PI | Avg DB score | Avg ion score | % coverage | # Spots UP | # Spots DOWN | Protein precursor | SwissProt Accession | #Gels  | Avg fold UP | Avg fold DOWN | Net change  |
|----------------------------------|---------------|-------------|--------------|---------------|------------|------------|--------------|-------------------|---------------------|--------|-------------|---------------|-------------|
| <b>NET CHANGE UP-REGULATED</b>   |               |             |              |               |            |            |              |                   |                     |        |             |               |             |
| IPI00477597                      | 38.9          | 6.4         | 118          | 91            | 26         | 7          | 0            | HpRP              | P00739              | 2 of 3 | 60          | 0             | 60 fold up  |
| IPI00607707                      | 43.0          | 6.4         | 114          | 91            | 24         | 7          | 0            |                   |                     |        |             |               |             |
| IPI00641737                      | 46.7          | 6.3         | 419          | 345           | 42         | 18         | 0            | Hp                | P00738              | 2 of 3 | 33          | 0             | 33 fold up  |
| IPI00478493                      | 38.4          | 6.1         | 426          | 344           | 50         | 18         | 0            |                   |                     |        |             |               |             |
| IPI00431645                      | 31.4          | 8.5         | 480          | 376           | 66         | 15         | 0            |                   |                     |        |             |               |             |
| IPI00022443                      | 68.6          | 5.5         | 393          | 270           | 54         | 5          | 0            | AFP               | P02771              | 2 of 3 | 7           | 0             | 7 fold up   |
| IPI00742696                      | 52.9          | 5.3         | 732          | 622           | 56         | 1          | 1            | VDBP              | P02774              | 2 of 3 | 8           | -6            | 2 fold up   |
| <b>NET CHANGE DOWN-REGULATED</b> |               |             |              |               |            |            |              |                   |                     |        |             |               |             |
| IPI00022434                      | 71.7          | 6.3         | 765          | 590           | 67         | 2          | 9            | ALB               | P02768              | 3 of 3 | 4           | -10           | 6 fold down |
| IPI00745872                      | 69.3          | 5.9         | 708          | 544           | 64         | 3          | 9            |                   |                     |        |             |               |             |
| IPI00878517                      | 56.2          | 6.8         | 642          | 517           | 64         | 2          | 9            |                   |                     |        |             |               |             |
| IPI00384697                      | 47.3          | 6.0         | 531          | 430           | 62         | 2          | 9            |                   |                     |        |             |               |             |
| IPI00216773                      | 45.1          | 5.8         | 390          | 289           | 68         | 1          | 7            |                   |                     |        |             |               |             |
| IPI00304273                      | 45.4          | 5.3         | 382          | 189           | 79         | 2          | 1            | APOA4             | P06727              | 2 of 3 | 9           | -4            | 5 fold down |
| IPI00847179                      | 45.3          | 5.3         | 350          | 172           | 75         | 2          | 1            | APOE              | P02649              | 2 of 3 | 0           | -3            | 3 fold down |
| IPI00021842                      | 36.1          | 5.7         | 841          | 576           | 120        | 0          | 2            |                   |                     |        |             |               |             |
| IPI00878953                      | 32.5          | 7.0         | 591          | 421           | 101        | 0          | 2            |                   |                     |        |             |               |             |
| IPI00879456                      | 24.9          | 5.8         | 448          | 292           | 109        | 0          | 2            | APOH              | P02749              | 2 of 3 | 3           | -6            | 3 fold down |
| IPI00298828                      | 38.3          | 8.3         | 482          | 406           | 58         | 4          | 4            |                   |                     |        |             |               |             |
| <b>NO NET CHANGE</b>             |               |             |              |               |            |            |              |                   |                     |        |             |               |             |
| IPI00478003                      | 163.2         | 6.0         | 765          | 572           | 37         | 3          | 1            | A2MG              | P01023              | 2 of 3 | 2           | -2            | zero        |

Abbreviations: IPI, International Protein Index; Avg, average; DB, database; HpRP, haptoglobin-related protein; Hp, haptoglobin; AFP,  $\alpha$ -fetoprotein; VDBP, vitamin-D binding-protein; ALB, albumin; APOA4, apolipoprotein-A4; APOE, apolipoprotein-E; APOH, apolipoprotein-H; A2MG,  $\alpha$ -microglobulin.
