# Supplementary material for: Proteomics Mapping of Cord Blood Identifies Haptoglobin “Switch-On” Pattern as Biomarker of Early-Onset Neonatal Sepsis in Preterm Newborns
Source: PubMed Central journal article supplement (PMC3189953; doi:10.1371/journal.pone.0026111), 2011-10-10
Supplement: pone.0026111.s002.pdf [file pone.0026111.s002.pdf]

**Table S2. Clinical characteristics of the mothers and newborns who provided cord blood used during the 1<sup>st</sup>-level validation (n=174)**

| Variable                                                                               | CLINICAL EONS       |                 | P value |
|----------------------------------------------------------------------------------------|---------------------|-----------------|---------|
|                                                                                        | NO (n=129)          | YES (n=45)      |         |
| <b>Maternal demographic and clinical characteristics at enrollment (amniocentesis)</b> |                     |                 |         |
| Maternal age, <i>years</i> †                                                           | 30 [23-34]          | 26 [21-34]      | 0.157   |
| Gravidity †                                                                            | 2 [1-4]             | 3 [2-4]         | 0.394   |
| Parity †                                                                               | 1 [0-2]             | 1 [0-2]         | 0.884   |
| Race §                                                                                 |                     |                 | 0.090   |
| Caucasian                                                                              | 58 (45)             | 11 (24)         |         |
| African-American                                                                       | 44 (34)             | 19 (42)         |         |
| Hispanic                                                                               | 20 (16)             | 12 (27)         |         |
| Other                                                                                  | 7 (5)               | 3 (7)           |         |
| Non-Caucasian race §                                                                   | 71 (55)             | 34 (76)         | 0.025   |
| Gestational age, <i>weeks</i> †                                                        | 29 [26-32]          | 26 [25-29]      | <0.001  |
| Cervical dilation, <i>cm</i> †                                                         | 1 [0-3]             | 3 [1-4]         | 0.001   |
| Ruptured membranes §                                                                   | 81 (63)             | 25 (56)         | 0.497   |
| Uterine contractions §                                                                 | 56 (43)             | 20 (44)         | 0.957   |
| History of preterm birth §                                                             | 33 (26)             | 18 (40)         | 0.101   |
| Clinical chorioamnionitis §                                                            | 11 (9)              | 5 (11)          | 0.828   |
| <b>Antenatal drug treatments/exposure</b>                                              |                     |                 |         |
| Steroids §                                                                             | 119 (92)            | 45 (100)        | 0.121   |
| Antibiotics §                                                                          | 107 (83)            | 39 (87)         | 0.727   |
| Tocolysis §                                                                            | 53 (41)             | 22 (49)         | 0.462   |
| Magnesium sulfate §                                                                    | 42 (32)             | 20 (44)         | 0.210   |
| Progesterone during pregnancy §                                                        | 18 (14)             | 10 (22)         | 0.287   |
| <b>Pregnancy outcome characteristics</b>                                               |                     |                 |         |
| Amniocentesis-to-delivery, <i>hours</i> †                                              | 24 [8-111]          | 8 [5-20]        | 0.003   |
| Indicated preterm delivery §                                                           | 66 (51)             | 31 (69)         | 0.059   |
| Gestational age at delivery, <i>weeks</i> †                                            | 30 [28-33]          | 26 [25-30]      | <0.001  |
| Birthweight, <i>grams</i> †                                                            | 1,450 [1,090-1,985] | 920 [770-1,517] | <0.001  |
| Cesarean delivery §                                                                    | 58 (45)             | 14 (33)         | 0.236   |
| Apgar score at 1 minute †                                                              | 8 [5-9]             | 5 [3-7]         | <0.001* |
| Apgar score at 5 minutes †                                                             | 9 [8-9]             | 8 [6-8]         | <0.001  |
| 1 min Apgar <7 §                                                                       | 42 (32)             | 29 (64)         | <0.001  |
| 5 min Apgar <7 §                                                                       | 14 (10)             | 16 (36)         | <0.001  |
| Newborn male gender §                                                                  | 62 (48)             | 20 (44)         | 0.806   |

† Data presented as median [interquartile range] and analyzed by Mann Whitney tests.

§ Data presented as n (%) and analyzed by Chi-square tests.

\*Postnatal variable remaining significant for EONS after correction for GA at birth in multivariate analysis.
