# Supplementary material for: Proteomics Mapping of Cord Blood Identifies Haptoglobin “Switch-On” Pattern as Biomarker of Early-Onset Neonatal Sepsis in Preterm Newborns
Source: PubMed Central journal article supplement (PMC3189953; doi:10.1371/journal.pone.0026111), 2011-10-10
Supplement: pone.0026111.s003.pdf [file pone.0026111.s003.pdf]

**Table S3. Laboratory characteristics of the mothers and newborns who provided cord blood used during the 1<sup>st</sup>-level validation (n=174)**

| Variable                                               | CLINICAL EONS       |                     | P value |
|--------------------------------------------------------|---------------------|---------------------|---------|
|                                                        | NO (n=129)          | YES (n=45)          |         |
| <b>Amniotic fluid analysis</b>                         |                     |                     |         |
| Glucose, mg/dL †                                       | 19[10-32]           | 3 [2-13]            | <0.001  |
| LDH, U/L †                                             | 260 [158-583]       | 744 [270-2,365]     | <0.001  |
| WBC, cells/mm <sup>3</sup> †                           | 24 [4-540]          | 444 [59-1,840]      | <0.001  |
| Positive Gram stain §                                  | 27 (21)             | 31 (69)             | <0.001  |
| Positive microbial cultures §                          | 28 (30)             | 36 (80)             | <0.001  |
| <b>Umbilical cord blood analysis</b>                   |                     |                     |         |
| Arterial pH †                                          | 7.31 [7.28-7.34]    | 7.32 [7.25-7.35]    | 0.972   |
| Arterial base deficit †                                | 4.4 [3.2-5.5]       | 6.1 [3.5-9.4]       | 0.074   |
| Venous pH                                              | 7.36 [7.33-7.39]    | 7.38 [7.28-7.40]    | 0.440   |
| Venous base deficit                                    | 3.8 [2.2-5.1]       | 4.8 [2.4-8.0]       | 0.143   |
| Arterial or Venous pH <7 §                             | 1 (1)               | 2 (6)               | 0.287   |
| <b>Placental histological analysis</b>                 |                     |                     |         |
| Chorionic plate inflammation, stages II-III §          | 60 (48)             | 41 (91)             | <0.001* |
| Amnionitis, stages 2-4 §                               | 46 (36)             | 37 (82)             | <0.001* |
| Choriodecidualitis, stages 2-4 §                       | 84 (66)             | 42 (93)             | <0.001* |
| Funisitis, stages 1-4 §                                | 45 (35)             | 30 (67)             | <0.001* |
| <b>Neonatal sepsis work-up</b>                         |                     |                     |         |
| WBC, cells x 1,000/mm <sup>3</sup> †                   | 10 [8-14]           | 15 [9.3-21]         | 0.003*  |
| Hemoglobin, mg/dL †                                    | 15.1 [13.8-16.2]    | 14 [12.6-15.4]      | 0.004   |
| Hematocrit, % †                                        | 46.1 [41.7-50.5]    | 43.6 [39.2-47.9]    | 0.014   |
| Platelets, cells x 1,000/mm <sup>3</sup> †             | 269 [222-308]       | 236 [176-331]       | 0.118   |
| Segmented neutrophils, % †                             | 36 [25-44]          | 27 [19-39]          | 0.010*  |
| Immature neutrophils (bands), % †                      | 2 [0-6]             | 17 [13-25]          | <0.001* |
| Lymphocytes, % †                                       | 44 [32-57]          | 29 [22-45]          | <0.001* |
| Monocytes, % †                                         | 11 [7-15]           | 10 [8-15]           | 0.901   |
| Absolute neutrophil count (ANC), cells/mm <sup>3</sup> | 3,550 [2,164-6,166] | 4,028 [2,148-6,778] | 0.688   |
| Absolute band count (ABC), cells/mm <sup>3</sup>       | 255 [0-674]         | 2,560 [1,456-3,808] | <0.001* |
| Immature/total neutrophil (I:T) ratio, %               | 2 [0-6]             | 17 [13-25]          | <0.001* |
| Presumed EONS §                                        | 0 (0)               | 41 (91)             | <0.001* |
| Culture positive (confirmed) EONS §                    | 0 (0)               | 7 (16)              | <0.001* |

† Data presented as median [interquartile range] and analyzed by Mann Whitney tests.

§ Data presented as n (%) and analyzed by Chi-square tests.

\*Postnatal variable remaining significant for EONS after correction for GA at birth in multivariate analysis.
