# Supplementary material for: Proteomics Mapping of Cord Blood Identifies Haptoglobin “Switch-On” Pattern as Biomarker of Early-Onset Neonatal Sepsis in Preterm Newborns
Source: PubMed Central journal article supplement (PMC3189953; doi:10.1371/journal.pone.0026111), 2011-10-10
Supplement: pone.0026111.s004.pdf [file pone.0026111.s004.pdf]

**Table S4. Results and cluster assignment for the newborns with positive blood culture (confirmed EONS, n=10)**

| Case # | GA at delivery (wks) | CB Hp Switch pattern | CB IL-6 (pg/mL) | CB IL6 >100 (pg/mL) | Presumed EONS | Cluster-2 probability (%) | Likely Exposed | Cultivated microorganisms                               |
|--------|----------------------|----------------------|-----------------|---------------------|---------------|---------------------------|----------------|---------------------------------------------------------|
| 1*     | 28 <sup>1/7</sup>    | OFF                  | 77              | NO                  | YES           | 20                        | NO             | <i>Staphylococcus</i> spp<br><i>Corynebacterium</i> spp |
| 2      | 26 <sup>1/7</sup>    | ON                   | 49,835          | YES                 | YES           | 100                       | YES            | <i>Streptococcus</i> Group B                            |
| 3      | 24 <sup>1/7</sup>    | ON                   | 19,818          | YES                 | YES           | 100                       | YES            | <i>Escherichia coli</i>                                 |
| 4      | 30 <sup>2/7</sup>    | OFF                  | 1,533           | YES                 | NO            | 70                        | YES            | <i>Escherichia coli</i>                                 |
| 5*     | 26 <sup>2/7</sup>    | OFF                  | 6               | NO                  | NO            | 2                         | NO             | <i>Staphylococcus</i> spp                               |
| 6      | 25 <sup>1/7</sup>    | ON                   | 90              | NO                  | YES           | 97                        | YES            | <i>Escherichia coli</i>                                 |
| 7      | 24 <sup>4/7</sup>    | ON                   | 461             | YES                 | YES           | 100                       | YES            | <i>Escherichia coli</i>                                 |
| 8      | 25 <sup>0/7</sup>    | ON                   | 354,860         | YES                 | NO            | 100                       | YES            | <i>Escherichia coli</i>                                 |
| 9      | 25 <sup>5/7</sup>    | ON                   | 3,252           | YES                 | NO            | 100                       | YES            | <i>Streptococcus</i> Group B                            |
| 10     | 24 <sup>6/7</sup>    | ON                   | 7,744           | YES                 | NO            | 100                       | YES            | <i>Streptococcus</i> Group B                            |

\* Cases 1 & 5 were classified as “likely non-exposed” by our algorithm despite the fact that blood cultures returned a positive result. The nature of the cultivated microorganism argues for *ex vivo* contamination of the specimen rather than EONS. The remaining cases were all classified as “likely exposed” despite infection with either Gram positive (n=3) or Gram negative species (n=5).
